# Supplementary material for: Synaptic plasticity through activation of GluA3-containing AMPA-receptors
Source: eLife. 2017 Aug 1;6:e25462. doi: 10.7554/eLife.25462 (PMC5578739; doi:10.7554/eLife.25462)
Supplement: Source data 1. [file elife-25462-data1.xlsx]

## Sheet: Figure 1
Figure 1 - source data
A										B
	wild type			GluA3 KO			GluA1 KO				GluA3 KO + SEP-GluA3
Amplitude	ctrl	IBMX+cAMP		ctrl	IBMX+cAMP		ctrl	IBMX+cAMP		Amplitude	ctrl	IBMX+FSK
mean	61.5333	119.708		59.2	74.3		9.98824	48.8		mean	59.5714	132.875
sd	22.9169	57.3262		21.8669	43.7094		4.74055	13.3177		sd	26.8959	66.4237
n	15	24		20	20		17	10		n	7	8
SEM	5.91711	11.7017		4.88958	9.77371		1.14975	4.21141		SEM	10.1657	23.4843
F (equal var.)	0.537286			0.0168478			0.309853			F (equal var.)	0.759432
p (t-test)	4.34049e-05			0.554745			1.86395e-08			p (t-test)	0.0267262
log-transformed	1.80618	2.0569		2.07918	1.5682		0.954243	1.78533		log-transformed	1.74036	2.30103
	1.91908	1.92942		1.66276	1.92942		0.90309	1.64345			1.30103	1.68124
	1.74819	2.36173		1.6721	2.20412		0.819544	1.74036			1.87506	1.8451
	1.60206	2.09342		1.79934	1.79934		1.07918	1.83885			1.5682	2.20412
	1.69897	2.33846		1.78533	1.95904		0.778151	1.72428			1.72428	1.72428
	1.8451	2.26951		1.69897	2.11394		1.27875	1.57978			1.81954	2.27646
	1.47712	2.43136		1.86332	1.65321		1.14613	1.4624			2.04532	2.0607
	1.74819	1.97313		1.8451	2.07918		0.681241	1.43136				2.35793
	1.87506	2		1.96848	2.13988		0.924279	1.78533
	1.69897	1.83251		1.78533	1.92428		0.792392	1.70757
	1.65321	2.01703		1.49136	2.03342		1.25527
	1.73239	1.70757		1.74819	1.41497		1.30103
	2	2.08279		1.74036	1.77085		0.69897
	1.54407	1.89209		1.94448	2.14613		0.90309
	2.0607	1.81291		1.81291	1.30103		0.845098
		1.95424		1.54407	1.51851		0.954243			raw data	55	200
		2.17609		1.47712	1.47712		0.944483				20	48
		1.79239		1.70757	1.73239						75	70
		1.98677		1.76343	1.43136						37	160
		1.95424		1.49136	1.5563						53	53
		2									66	189
		2.30103									111	115
		1.95424										228
		1.9345
raw data	64	114		120	37		9	61
	83	85		46	85		8	44
	56	230		47	160		6.6	55
	40	124		63	63		12	69
	50	218		61	91		6	53
	70	186		50	130		19	38
	30	270		73	45		14	29
	56	94		70	120		4.8	27
	75	100		93	138		8.4	61
	50	68		61	84		6.2	51
	45	104		31	108		18
	54	51		56	26		20
	100	121		55	59		5
	35	78		88	140		8
	115	65		65	20		7
		90		35	33		9
		150		30	30		8.8
		62		51	54
		97		58	27
		90		31	36
		100
		200
		90
		86
D
	wild type			GluA3 KO			GluA1 KO				wild type			GluA3 KO			GluA1 KO				wild type			GluA3 KO			GluA1 KO
N Channels	ctrl	IBMX+cAMP		ctrl	IBMX+cAMP		ctrl	IBMX+cAMP		Conductance	ctrl	IBMX+cAMP		ctrl	IBMX+cAMP		ctrl	IBMX+cAMP		Open Probability	ctrl	IBMX+cAMP		ctrl	IBMX+cAMP		ctrl	IBMX+cAMP
mean	38.7143	77.125		56.6	79.0909		10.5	34		mean	23.7857	23.9375		24.2778	23.4		12.625	24.4286		mean	0.743571	0.86125		0.845	0.861818		0.6075	0.837143
sd	30.0724	40.6815		32.8609	38.8294		2.64575	16.2569		sd	12.5139	7.94881		11.6883	16.3963		3.60338	8.59995		sd	0.16025	0.083955		0.143962	0.123496		0.129108	0.0893971
n	14	16		10	11		8	7		n	14	16		9	10		8	7		n	14	16		10	11		8	7
SEM	8.03718	10.1704		10.3915	11.7075		0.935414	6.14452		SEM	3.34447	1.9872		3.89611	5.18498		1.27399	3.25048		SEM	0.0428286	0.0209887		0.0455247	0.0372354		0.0456464	0.0337889
F (equal var.)	0.65217			0.816893			0.117563			F (equal var.)	0.0220347			0.507884			0.413928			F (equal var.)	0.00210871			0.628337			0.136266
p (t-test)	0.00265138			0.180943			0.000195232			p (t-test)	0.520949			0.648606			0.00447942			p (t-test)	0.0196229			0.765522			0.00384934
log-transformed	1.4624	1.95424		1.32222	1.96379		1	1.5563		log-transformed	1.32222	1.30103		1.41497	1.14613		0.954243	1.20412		log-transformed	-0.0809219	-0.0409586		-0.130768	-0.0362122		-0.148742	-0.0132283
	1.17609	1.4624		1.30103	2.07918		1.04139	1.44716			1.25527	1.39794		1.69897	1.81954		1.14613	1.51851			-0.356547	-0.0315171		-0.0132283	-0.244125		-0.09691	-0.173925
	1.4624	2.07555		1.716	1.32222		1.11394	1.49136			1.70757	1.51851		1.11394	1.47712		1.11394	1.07918			-0.309804	-0.0362122		-0.00436481	-0.0809219		-0.356547	-0.0757207
	1.25527	1.79239		1.8451	1.91908		0.954243	1.81954			1	1.51851		1.14613	1.07918		0.90309	1.27875			-0.229148	-0.091515		-0.0457575	-0.167491		-0.119186	-0.102373
	1.53148	1.90849		1.90849	2.14613		0.845098	1.25527			1.4624	1.4624		1.09691	1.17609		1.17609	1.47712			-0.0655015	-0.0222764		-0.180456	-0.00436481		-0.283997	-0.0457575
	1.07918	2.20952		2.09691	2		0.845098	1.65321			1.39794	1.62325		1.23045	1.25527		1.30103	1.38021			-0.0222764	-0.0705811		-0.091515	-0.00877392		-0.19382	-0.09691
	1.78533	1.6902		1.83885	1.90849		1.07918	1.14613			0.69897	1.07918		1.5563	1.5682		1	1.5682			-0.107905	-0.136677		-0.05061	-0.0604807		-0.318759	-0.05061
	1.44716	1.75587		1.38021	1.17609		1.17609				1.04139	1.39794		1.41497	1.17609		1.07918				-0.275724	-0.0555173		-0.259637	-0.0705811		-0.29243
	1.47712	1.63347		1.39794	2.02119						1.54407	1.20412		1.38021	1.27875						-0.130768	-0.0457575		-0.0222764	-0.0222764
	2.05308	1.27875			1.91908						1.38021	1.34242			0.90309						-0.0604807	-0.136677		-0.00436481	-0.0362122
	1.27875	1.85126									0.90309	1.14613									-0.0457575	-0.00436481			-0.0362122
	1.99564	1.57978									1.50515	1.39794									-0.0409586	-0.09691
	1.59106	2.04922									1.59106	1.49136									-0.124939	-0.0604807
	1.20412	1.66276									1.39794	1.30103									-0.113509	-0.05061
		2.13354										1.14613										-0.161151
		2.07918										1.34242										-0.0315171
raw data	29	90		21	92		10	36		raw data	21	20		26	14		9	16		raw data	0.83	0.91		0.74	0.92		0.71	0.97
	15	29		20	120		11	28			18	25		50	66		14	33			0.44	0.93		0.97	0.57		0.8	0.67
	29	119		52	21		13	31			51	33		13	30		13	12			0.49	0.92		0.99	0.83		0.44	0.84
	18	62		70	83		9	66			10	33		14	12		8	19			0.59	0.81		0.9	0.68		0.76	0.79
	34	81		81	140		7	18			29	29		12.5	15		15	30			0.86	0.95		0.66	0.99		0.52	0.9
	12	162		125	100		7	45			25	42		17	18		20	24			0.95	0.85		0.81	0.98		0.64	0.8
	61	49		69	81		12	14			5	12		36	37		10	37			0.78	0.73		0.89	0.87		0.48	0.89
	28	57		24	15		15				11	25		26	15		12				0.53	0.88		0.55	0.85		0.51
	30	43		25	105						35	16		24	19						0.74	0.9		0.95	0.95
	113	19		79	83						24	22			8						0.87	0.73		0.99	0.92
	19	71			30						8	14									0.9	0.99			0.92
	99	38									32	25									0.91	0.8
	39	112									39	31									0.75	0.87
	16	46									25	20									0.77	0.89
		136										14										0.69
		120										22										0.93
E
cell body	GluA3 KO + SEP-GluA3						dendrite	GluA3 KO + SEP-GluA3
Norm. F intensity	-6 min	-1 min	30 min	40 min			Norm. F intensity	-6 min	-1 min	30 min	40 min
mean	1.00425	0.997716	1.00475	0.992214			mean	1	0.979199	0.923999	0.928848
sd	0.0116105	0.0130004	0.035962	0.0262751			sd	0.199711	0.179968	0.1757	0.193199
n	10	10	10	10			n	12	12	12	12
SEM	0.00367157	0.00411108	0.0113722	0.00830893			SEM	0.0576517	0.0519522	0.0507203	0.0557718
F (equal var.)	0.0192087						F (equal var.)	0.810113
p (t-test)	0.219816						p (t-test)	0.378849
log-transformed	0.00229957	0.00852949	0.0372284	0.00337866			log-transformed	-0.000882383	-0.0119651	-0.0618137	0.0254017
	0.00055424	-0.00298603	-0.0167491	-0.000112931				-0.0571922	-0.0705351	-0.132942	-0.139266
	-0.00217648	0.00122992	0.0135635	0.00813753				-0.0983254	-0.0954121	-0.102337	-0.105584
	0.000999897	0.00206147	-0.00516042	-0.0068606				0.090269	0.0615004	0.0635927	0.08096
	-0.00422533	0.00527277	0.00649043	0.00491307				0.0704273	0.0437716	-0.00339885	-0.000699647
	-0.00217081	0.00115802	-0.00684869	-0.00553943				0.0177051	0.0232858	0.0157239	0.0216102
	0.0101926	-0.00758788	0.00722401	-0.028527				0.16242	0.144524	0.112253	0.109136
	-0.00179997	-0.00213677	0.00320841	0.0116309				0.0158315	0.0244294	0.00924857	-0.00629798
	0.0115235	-0.011623	-0.0184165	-0.0181637				-0.00203181	-0.0120376	-0.0360128	-0.0385884
	0.00293156	-0.00421919	-0.00269839	-0.00434594				-0.0650943	-0.0624302	-0.0752933	-0.141284
								-0.124921	-0.133358	-0.156191	-0.157832
								-0.106508	-0.105468	-0.135562	-0.143931
raw data	1.00531	1.01983	1.0895	1.00781			raw data	0.99797	0.972826	0.867334	1.06023
	1.00128	0.993148	0.962168	0.99974				0.876613	0.85009	0.736305	0.725661
	0.995001	1.00284	1.03172	1.01891				0.797397	0.802764	0.790065	0.78418
	1.00231	1.00476	0.988188	0.984327				1.23103	1.15213	1.15769	1.20493
	0.990318	1.01222	1.01506	1.01138				1.17605	1.10604	0.992204	0.99839
	0.995014	1.00267	0.984354	0.987326				1.04161	1.05508	1.03687	1.05102
	1.02375	0.98268	1.01677	0.936425				1.45352	1.39484	1.29495	1.28569
	0.995864	0.995092	1.00741	1.02714				1.03713	1.05786	1.02152	0.985603
	1.02689	0.973592	0.958481	0.959039				0.995332	0.972663	0.920423	0.91498
	1.00677	0.990332	0.993806	0.990043				0.860807	0.866104	0.840827	0.722298
								0.750031	0.7356	0.697925	0.695294
								0.782513	0.78439	0.731877	0.717908

## Sheet: Figure 1 - supplement 1
Figure 1 - supplement 1 - source data
supplement 1
	GluA3-KO + SEP-GluA3
Amplitude	ctrl	IBMX
mean	59.5714	80.3333
sd	26.8959	28.4527
n	7	3
SEM	10.1657	16.4272
F (equal var.)	0.971105
p (t-test)	0.383751
log-transformed	1.74036	1.63347
	1.30103	2.04922
	1.87506	1.9345
	1.5682
	1.72428
	1.81954
	2.04532
raw data	55	43
	20	112
	75	86
	37
	53
	66
	111

## Sheet: Figure 1 - supplement 2
Figure 1 - supplement 2 - source data
supplement 2
cell body	GluA3 KO + SEP-GluA3						dendrite	GluA3 KO + SEP-GluA3
Norm. F intensity	-6 min	-1 min	0.5 min	3.5 min	6.5 min		Norm. F intensity	-6 min	-1 min	0.5 min	3.5 min	6.5 min
mean	1	1.05079	0.829912	0.426813	0.278791		mean	1	1.01685	0.931999	0.595992	0.48282
sd	0	0.0627849	0.0535476	0.0321848	0.035683		sd	0	0.015464	0.0147783	0.0478711	0.0595263
n	3	3	3	3	2		n	2	2	2	2	2
SEM	0	0.0362489	0.0309157	0.0185819	0.0252317		SEM	0	0.0109347	0.0104499	0.03385	0.0420914
F (equal var.)							F (equal var.)
p (t-test)							p (t-test)
log-transformed	0	0.0156401	-0.103594	-0.406444	-0.614201		log-transformed	0	0.0138118	-0.0375262	-0.261123	-0.373358
	0	0.0545253	-0.0431245	-0.328142	-0.502415			0	0.000601515	-0.0237521	-0.191206	-0.265723
	0	-0.00791593	-0.0988246	-0.37835
raw data	1	1.03667	0.787782	0.392244	0.243108		raw data	1	1.03231	0.917221	0.548121	0.423294
	1	1.13377	0.905473	0.46974	0.314474			1	1.00139	0.946777	0.643863	0.542346
	1	0.981938	0.796481	0.418456

## Sheet: Figure 2
Figure 2 - source data
A
	GluA3 KO			Relative Fraction	GluA3 KO				GluA3 KO				GluA3 KO
Open Probability	ctrl	FSK		O1	ctrl	FSK		O2	ctrl	FSK		O3	ctrl	FSK
mean	0.370164	0.267769		mean	0.659294	0.702494		mean	0.179132	0.175279		mean	0.161574	0.122398
sd	0.34825	0.216127		sd	0.234766	0.188486		sd	0.150284	0.124377		sd	0.167586	0.158764
n	15	14		n	15	14		n	15	14		n	15	14
SEM	0.0899178	0.0577624		SEM	0.0606164	0.0503751		SEM	0.0388032	0.0332412		SEM	0.0432706	0.0424316
F (equal var.)	0.247616			F (equal var.)	0.0880491			F (equal var.)	0.408713			F (equal var.)	0.183365
p (t-test)	0.92769			p (t-test)	0.467903			p (t-test)	0.702432			p (t-test)	0.212127
log-transformed	-0.606381	-0.176771		log-transformed	-0.090236	-0.265748		log-transformed	-1.2469	-0.345964		log-transformed	-0.882818	-2.16552
	-0.102891	-0.759688			-0.320236	-0.0500151			-0.401558	-1.00212			-0.903271	-2.03301
	-1.45234	-1.4277			-0.130221	-0.010921			-0.604315	-1.67753			-1.98451	-2.41794
	-0.711212	-0.906491			-0.0600801	-0.0320577			-0.975424	-1.14778			-1.63127	-3.02273
	-0.00304988	-1.2899			-0.846539	-0.175763			-0.49026	-0.605357			-0.272283	-1.07201
	-0.936494	-1.51235			-0.0480853	-0.0686149			-2.36694	-0.960158			-0.997769	-1.43728
	-0.450951	-0.755466			-0.132865	-0.319705			-0.895612	-1.88399			-0.865208	-0.292912
	-1.39494	-0.280152			-0.0592704	-0.499279			-0.923207	-0.68312			-2.0846	-0.322564
	-0.0181696	-0.746023			-0.420066	-0.134342			-0.345471	-0.750183			-0.773398	-1.05398
	-0.132015	-0.725634			-0.262339	-0.0534323			-0.437015	-1.11785			-1.05636	-1.40308
	-0.15643	-0.288186			-0.326106	-0.211564			-0.484139	-0.688685			-0.698835	-0.742734
	-1.08314	-0.241316			-0.0691554	-0.230251			-1.43414	-0.492531			-0.957019	-1.0468
	-2.05547	-0.359676			-0.441996	-0.256709			-1.31058	-0.468226			-0.229388	-0.974493
	-0.590764	-1.13972			-0.030448	-0.0937372			-1.41998	-0.949118			-1.52742	-1.08776
	-1.39066				-0.0994641				-1.44073				-0.773547
raw data	0.247525	0.665624		raw data	0.812389	0.542315		raw data	0.056637	0.450854		raw data	0.130973	0.006831
	0.789058	0.173905			0.47837	0.89122			0.396682	0.099512			0.124948	0.009268
	0.035291	0.037351			0.740933	0.975167			0.248705	0.021012			0.010363	0.00382
	0.194441	0.124025			0.870803	0.928843			0.105822	0.071157			0.023374	0.000949
	0.993002	0.051298			0.142384	0.667171			0.3234	0.248109			0.534216	0.08472
	0.115746	0.030736			0.895189	0.853857			0.004296	0.109608			0.100515	0.036536
	0.354037	0.175604			0.736436	0.478955			0.127171	0.013062			0.136393	0.509434
	0.040277	0.524624			0.872428	0.316753			0.119342	0.207434			0.00823	0.475813
	0.959026	0.179464			0.380132	0.733935			0.451366	0.177753			0.168501	0.088313
	0.737879	0.18809			0.546589	0.884235			0.365582	0.076235			0.087829	0.039529
	0.697542	0.515008			0.471948	0.614379			0.32799	0.204793			0.200062	0.180828
	0.082578	0.573699			0.852795	0.588503			0.036801	0.321713			0.110403	0.089784
	0.008801	0.436842			0.361413	0.553721			0.048913	0.340231			0.589674	0.106049
	0.256588	0.07249			0.932292	0.805866			0.038021	0.11243			0.029688	0.081704
	0.040676				0.795309				0.036247				0.168443
	GluA3 KO			Conductance	GluA3 KO				GluA3 KO				GluA3 KO
Average Conductance	ctrl	FSK		O1	ctrl	FSK		O2	ctrl	FSK		O3	ctrl	FSK
mean	31.9032	29.543		mean	19.2736	19.286		mean	41.6474	41.2527		mean	74.4489	71.2646
sd	10.5817	8.92419		sd	2.29815	2.02237		sd	1.74019	2.33712		sd	9.82976	8.43404
n	15	14		n	15	14		n	15	14		n	15	14
SEM	2.73218	2.38509		SEM	0.59338	0.540502		SEM	0.449316	0.624623		SEM	2.53803	2.25409
F (equal var.)	0.825968			F (equal var.)	0.589032			F (equal var.)	0.267874			F (equal var.)	0.649136
p (t-test)	0.538815			p (t-test)	0.954856			p (t-test)	0.594488			p (t-test)	0.372685
log-transformed	1.40835	1.48502		log-transformed	1.22012	1.38589		log-transformed	1.63619	1.57517		log-transformed	1.86823	1.78059
	1.54479	1.37595			1.33619	1.33407			1.61403	1.59828			1.82618	1.80118
	1.42054	1.26199			1.3341	1.24384			1.58929	1.57055			1.81991	1.97902
	1.35703	1.29952			1.27429	1.26585			1.5859	1.5948			1.99265	1.85012
	1.73176	1.45942			1.31745	1.28574			1.65931	1.62958			1.83105	1.80007
	1.38179	1.36164			1.24115	1.26789			1.61572	1.61236			1.91749	1.86591
	1.47804	1.67286			1.2438	1.21989			1.61471	1.64846			1.94135	1.88014
	1.3514	1.69488			1.28948	1.25643			1.61562	1.66508			1.82012	1.85686
	1.58276	1.44123			1.37758	1.27801			1.61737	1.6126			1.79419	1.86116
	1.50543	1.32239			1.34013	1.23091			1.60005	1.61663			1.79697	1.8513
	1.59559	1.51787			1.32364	1.25429			1.62868	1.63032			1.88962	1.86248
	1.40678	1.49771			1.24593	1.31847			1.62166	1.61848			1.90887	1.81317
	1.74569	1.51695			1.20705	1.32863			1.6337	1.62328			1.90839	1.80633
	1.28494	1.42728			1.22356	1.29172			1.6203	1.61103			1.84701	1.89263
	1.44881				1.25437				1.63562				1.86184
raw data	25.6065	30.5503		raw data	16.6004	24.3157		raw data	43.2703	37.5983		raw data	73.8302	60.3384
	35.0584	23.7656			21.6865	21.5808			41.1179	39.6531			67.0161	63.2667
	26.3357	18.2807			21.5826	17.5322			38.841	37.2007			66.0551	95.2832
	22.7527	19.9306			18.8057	18.444			38.5393	39.3367			98.3229	70.8139
	53.9207	28.8016			20.7705	19.308			45.6364	42.6165			67.7713	63.1059
	24.0876	22.9952			17.4241	18.5308			41.278	40.9601			82.6977	73.4363
	30.0639	47.0822			17.5309	16.5916			41.1825	44.5099			87.3674	75.8821
	22.4596	49.5312			19.475	18.0479			41.269	46.2469			66.088	71.9217
	38.2611	27.6205			23.8549	18.9677			41.4354	40.9822			62.2579	72.6365
	32.0205	21.0084			21.8842	17.0182			39.8153	41.3647			62.6569	71.0067
	39.4081	32.951			21.0686	17.9594			42.5282	42.689			77.556	72.8577
	25.514	31.4562			17.6168	20.8197			41.8464	41.5414			81.0713	65.0379
	55.6793	32.8813			16.1085	21.3125			43.023	42.0032			80.9822	64.0214
	19.2728	26.7471			16.7323	19.5757			41.7156	40.8347			70.3094	78.0956
	28.1068				17.9627				43.2131				72.7512
B
	GluA1 KO			Relative Fraction	GluA1 KO				GluA1 KO				GluA1 KO
Open Probability	ctrl	FSK		O1	ctrl	FSK		O2	ctrl	FSK		O3	ctrl	FSK
mean	0.0485901	0.290688		mean	0.930763	0.606521		mean	0.0514294	0.199611		mean	0.018164	0.208472
sd	0.0797989	0.234529		sd	0.0832965	0.155189		sd	0.0664008	0.0959402		sd	0.0359557	0.136524
n	15	13		n	15	13		n	15	13		n	15	13
SEM	0.020604	0.0650468		SEM	0.0215071	0.0430418		SEM	0.0171446	0.026609		SEM	0.00928373	0.0378649
F (equal var.)	0.00318895			F (equal var.)	0.000481882			F (equal var.)	0.00399738			F (equal var.)	0.260494
p (t-test)	0.000102731			p (t-test)	3.5017e-06			p (t-test)	0.000150977			p (t-test)	1.0835e-06
log-transformed	-2.44928	-1.36177		log-transformed	-0.00753264	-0.233379		log-transformed	-1.82588	-1.14285		log-transformed	-2.74232	-0.463757
	-1.34373	-0.612979			-0.118463	-0.315641			-0.622641	-0.561285			-3.03905	-0.616307
	-4.26043	-0.885549			-0.00351679	-0.112256				-0.69198			-2.0934	-1.6103
	-1.97675	-0.708203			-0.0425833	-0.34357			-1.0449	-0.458899			-2.49201	-0.701066
	-1.71209	-0.456369			-0.0274218	-0.0540767			-1.25225	-0.99738			-2.28025	-1.78328
	-1.66428	-1.02479			-0.000902097	-0.195206			-2.38206	-0.599472			-2.68298	-0.942867
	-1.7212	-0.109914			-0.0158919	-0.18988			-1.73014	-1.02803			-1.76155	-0.584331
	-2.9594	-1.10391			-0.0531247	-0.104529			-1.86954	-0.741245			-0.992958	-1.4886
	-2.24926	-0.44562			-0.00135363	-0.19564			-2.50696	-0.455495			-2.98422	-0.90925
	-2.45942	-0.396924			0	-0.145494				-0.960629				-0.601005
	-1.71974	-0.107272			-0.0274699	-0.451608			-1.25418	-0.493065			-2.25197	-0.487876
	-0.735844	-0.93207			-0.146789	-0.433816			-0.768365	-0.857595			-0.934293	-0.307233
	-0.543295	-0.679646			-0.00599669	-0.248554			-1.89763	-0.823217			-2.97675	-0.544327
	-2.51272				-0.0180981				-1.43492				-2.38913
	-0.970527				-0.0273807				-1.24393				-2.39009
raw data	0.003554	0.043474		raw data	0.982805	0.58428		raw data	0.014932	0.07197		raw data	0.00181	0.34375
	0.045318	0.243793			0.761267	0.483458			0.238429	0.274609			0.000914	0.241932
	5.49e-05	0.130152			0.991935	0.772226			0	0.203245			0.008065	0.02453
	0.01055	0.195793			0.906602	0.453346			0.090177	0.347617			0.003221	0.199037
	0.019405	0.349648			0.938811	0.882924			0.055944	0.100605			0.005245	0.016471
	0.021663	0.094451			0.997925	0.637961			0.004149	0.251494			0.002075	0.11406
	0.019002	0.7764			0.964069	0.645833			0.018615	0.09375			0.017316	0.260417
	0.001098	0.07872			0.884861	0.786087			0.0135039	0.181449			0.101635	0.032464
	0.005633	0.35841			0.996888	0.637324			0.003112	0.350352			0.001037	0.123239
	0.003472	0.400937			1	0.715329			0	0.109489			0	0.250608
	0.019066	0.781138			0.938707	0.353502			0.055695	0.321318			0.005598	0.32518
	0.18372	0.116931			0.7132	0.368285			0.170465	0.138805			0.116334	0.492909
	0.286223	0.2091			0.986287	0.564217			0.012658	0.150239			0.001055	0.285544
	0.003071				0.959184				0.036735				0.004082
	0.107022				0.9389				0.057026				0.004073
	GluA1 KO			Conductance	GluA1 KO				GluA1 KO				GluA1 KO
Average Conductance	ctrl	FSK		O1	ctrl	FSK		O2	ctrl	FSK		O3	ctrl	FSK
mean	19.2552	35.3914		mean	17.1919	18.2173		mean	38.6436	41.9781		mean	78.7854	74.5162
sd	3.93519	9.34387		sd	1.48672	2.09465		sd	5.14873	2.38009		sd	23.9667	13.588
n	15	13		n	15	13		n	13	13		n	14	13
SEM	1.01606	2.59152		SEM	0.38387	0.580951		SEM	1.428	0.660118		SEM	6.40538	3.76863
F (equal var.)	0.176755			F (equal var.)	0.372348			F (equal var.)	0.00129191			F (equal var.)	0.096182
p (t-test)	3.84865e-07			p (t-test)	0.161229			p (t-test)	0.0643719			p (t-test)	0.799996
log-transformed	1.21236	1.62067		log-transformed	1.19941	1.2578		log-transformed	1.63851	1.61777		log-transformed	1.76833	1.91382
	1.37967	1.5435			1.28107	1.19626			1.59544	1.67583			1.59333	1.77284
	1.24729	1.37865			1.23248	1.26958				1.59947			1.95692	1.77665
	1.28793	1.55089			1.23517	1.23032			1.60521	1.65597			1.77462	1.78411
	1.27935	1.33369			1.24349	1.2658			1.607	1.60127			1.78044	1.88452
	1.22278	1.44277			1.21348	1.28707			1.46662	1.61901			2.12138	1.71738
	1.24305	1.60588			1.20733	1.22645			1.59239	1.6418			1.85233	1.98857
	1.35671	1.46314			1.28845	1.2624			1.62134	1.62224			1.77829	1.80299
	1.22278	1.52206			1.21387	1.19622			1.3958	1.60338			1.90532	1.90988
	1.15733	1.44361			1.15733	1.20424				1.58111				1.92049
	1.28531	1.71854			1.24977	1.37665			1.60745	1.61342			1.79514	1.97497
	1.49138	1.71702			1.30379	1.29824			1.62349	1.63322			1.91121	1.89649
	1.23275	1.59946			1.22292	1.28026			1.59104	1.62593			2.00741	1.8995
	1.23847				1.19881				1.6182				2.01987
	1.29542				1.25831				1.60843				2.00257
raw data	16.3066	41.7511		raw data	15.8273	18.1049		raw data	43.5016	41.4738		raw data	58.6581	82.0011
	23.9699	34.9541			19.1017	15.713			39.3953	47.4053			39.2039	59.2711
	17.6724	23.9139			17.0798	18.603				39.7622			90.5556	59.7929
	19.4057	35.5541			17.1858	16.9948			40.2914	45.2867			59.5137	60.8288
	19.0261	21.5619			17.5183	18.4416			40.4575	39.927			60.3174	76.6507
	16.7024	27.7185			16.3487	19.3675			29.2831	41.5925			132.244	52.1651
	17.5003	40.3533			16.1188	16.8443			39.1188	43.8329			71.1747	97.403
	22.7355	29.0494			19.4288	18.298			41.8156	41.9024			60.0195	63.5314
	16.7024	33.2708			16.3631	15.7117			24.8771	40.1217			80.4118	81.2599
	14.3657	27.7723			14.3657	16.0045				38.1164				83.2712
	19.2889	52.3052			17.7734	23.8042			40.4997	41.0599			62.393	94.4002
	31.0011	52.122			20.1277	19.8717			42.0237	42.975			81.5102	78.7942
	17.0902	39.7617			16.7079	19.066			38.9979	42.2601			101.721	79.3406
	17.3169				15.8057				41.5143				104.681
	19.7433				18.1263				40.591				100.593

## Sheet: Figure 3
Figure 3 - source data
A							B
	wild type			GluA3 KO				wild type			GluA3 KO
AMPA/NMDA	ctrl	FSK		ctrl	FSK		Paired Pulse Ratio	ctrl	FSK		ctrl	FSK
mean	1.50696	3.48879		1.98061	2.1174		mean	1.56614	1.44717		1.19606	1.14525
sd	0.739662	2.19753		0.710775	0.636069		sd	0.196554	0.278023		0.285272	0.35828
n	9	13		8	8		n	8	8		8	8
SEM	0.246554	0.609486		0.251297	0.224884		SEM	0.0694924	0.0982959		0.100859	0.126671
F (equal var.)	0.130293			0.581143				0.139977			0.28567
p (t-test)	0.0143404			0.628637				0.339986			0.656068
log-transformed	0.53642	0.0135113		0.320786			log-transformed	0.13389	0.10738		-0.040129	0.179379
	0.215082	0.428702		0.169758	0.284591			0.206232	0.198162		0.242641	0.108768
	0.259952	-0.0383227		0.165641	0.123964			0.130784	0.185287		0.105067	0.126521
	0.0516541	0.196867		0.165641				0.143358	-0.0681914		0.146996	0.193681
	-0.00277093	0.153113		-0.0094587	0.428419			0.189322	0.256285		0.000260499	-0.151072
		0.396007		0.420123	0.520936			0.22084	0.152594		0.0727644	-0.267638
		0.323165		0.507297	0.21849			0.210426	0.238774		0.103256	0.125286
	0.0576281	0.81905		0.401312	0.348659			0.297782	0.137924		-0.107655	-0.052939
	0.078964	0.896526			0.379579
	-0.0622715	0.552583			0.146371
	0.125709	0.78963
		0.701991
		0.590686
raw data	3.4389	1.0316		2.09308			raw data	1.3611	1.2805		0.91174	1.5114
	1.6409	2.6835		1.47829	1.92571			1.6078	1.5782		1.7484	1.2846
	1.8195	0.91554		1.46434	1.33034			1.3514	1.5321		1.2737	1.3382
	1.1263	1.5735		1.46434				1.3911	0.85469		1.4028	1.562
	0.99364	1.4227		0.978456	2.68175			1.5464	1.8042		1.0006	0.7062
		2.4889		2.63101	3.31846			1.6628	1.421		1.1824	0.53996
		2.10458		3.21586	1.65383			1.6234	1.7329		1.2684	1.3344
	1.1419	6.5925		2.51948	2.23182			1.9851	1.3738		0.78045	0.88524
	1.1994	7.88			2.39651
	0.86642	3.5693			1.40078
	1.3357	6.1607
		5.0349
		3.8966
C
	wild type			GluA3 KO			GluA3 KO + GFP-GluA3									wild type			GluA3 KO			GluA3 KO + GFP-GluA3
mEPSC Frequency	ctrl	FSK		ctrl	FSK		ctrl	FSK	fold freq change	wild type	GluA3 KO	GluA3 KO + GFP-GluA3			mEPSC Amplitude	ctrl	FSK		ctrl	FSK		ctrl	FSK	fold ampl change	wild type	GluA3 KO	GluA3 KO + GFP-GluA3
mean	0.908933	2.83056		0.7985	1.11		0.7185	1.60564		3.11416	1.39011	2.23471			mean	10.9947	14.8189		10.8649	10.9998		10.3588	11.8008		1.34782	1.01242	1.13921
sd	0.322692	1.13637		0.166035	0.434493		0.168942	0.233115		1.25023	0.544136	0.324447			sd	2.25372	3.77211		1.56285	1.54901		1.45428	1.92534		0.343083	0.142571	0.185866
n	15	16		8	9		8	11		16	9	11			n	15	16		8	9		8	11		16	9	11
SEM	0.0833186	0.284093		0.0587021	0.144831		0.0597299	0.0702868		0.312556	0.181379	0.0978244			SEM	0.581907	0.943027		0.55255	0.516337		0.514164	0.580512		0.0857708	0.0475235	0.0560407
F (equal var.)	0.45415			0.156443			0.208985									0.87082			0.85684			0.812124
p (t-test)	2.08156e-07			0.153609			4.91941e-07									0.00107957			0.852792			0.102072
log-transformed	-0.142668	0.101747		-0.0535477	0.152288		-0.0268721	0.0534626		0.143215	0.250013	0.197036			log-transformed	1.00359	0.978363		0.988381	1.04685		0.93857	1.08707		-0.0628216	0.0108215	0.0717639
	-0.0979971	0.426023		-0.0154727	-0.102373		-0.262807	0.111599		0.467491	-0.00464783	0.255172				1.12005	1.18201		1.03024	1.03842		1.05774	1.02375		0.14083	0.00239671	0.00843881
	-0.355561	0.552425		-0.217527	-0.0535477		-0.196543	0.190332		0.593893	0.0441773	0.333905				0.949097	1.27152		1.0146	1.03715		0.931966	1.09079		0.230332	0.00112277	0.0754796
	-0.0319843	0.568671		-0.14752	0.137354		-0.341989	0.239299		0.610139	0.235079	0.382873				0.915664	1.17975		0.940267	1.02473		1.10548	1.164		0.138568	-0.0112928	0.148688
	0.0934217	0.331832		-0.286509	0.263873		-0.0579919	0.248219		0.3733	0.361598	0.391792				1.11411	1.132		0.996424	1.06774		0.96459	1.10772		0.0908187	0.0317155	0.0924113
	0.0867157	0.385428		-0.0644927	-0.269218		-0.076238	0.176091		0.426895	-0.171493	0.319664				1.10044	1.15606		1.1499	0.97322		1.07566	1.19896		0.11488	-0.0628045	0.183652
	0.139564	0.292699		-0.0177288	0.212986		-0.223299	0.281942		0.334167	0.310711	0.425515				1.14308	1.04867		1.08586	1.17088		0.992686	1.02119		0.00749011	0.134853	0.00588195
	0.114944	0.46434		-0.00261362	-0.152427		-0.0660068	0.256237		0.505808	-0.0547023	0.39981				1.12346	1.17731		1.0484	0.96199		1.02181	0.981637		0.136121	-0.0740344	-0.0336699
	-0.0560111	0.527243			-0.0899095			0.209515		0.568711	0.00781563	0.353088				1.09328	1.18792			1.01628			1.03866		0.146731	-0.0197437	0.0233525
	0.0856473	0.743588						0.270213		0.785056		0.413786				1.15042	1.11019						1.04712		0.0690008		0.0318117
	-0.0530567	0.608633								0.650101		0.314128				0.927062	1.11558						0.969649		0.0743925		-0.0456585
	-0.0899095	0.617629								0.659097						0.992951	1.11558								0.0743925
	-0.00833099	0.318689								0.360157						0.942901	1.15165								0.110461
	-0.744727	0.176091								0.217559						0.863977	1.08831								0.0471286
	-0.189096	0.414472								0.45594						1.03427	1.43154								0.390356
		0.127105								0.168573							1.22063								0.179446
raw data	0.72	1.264		0.772	1.42		0.94	1.131		1.39064	1.77833	1.57411			raw data	10.083	9.514		9.736	11.139		8.681	12.22		0.865323	1.02523	1.17968
	0.798	2.667		0.965	0.79		0.546	1.293		2.93421	0.989355	1.79958				13.184	15.206		10.721	10.925		11.422	10.562		1.38303	1.00553	1.01962
	0.441	3.568		0.606	0.884		0.636	1.55		3.92548	1.10708	2.15727				8.894	18.686		10.342	10.893		8.55	12.325		1.69954	1.00259	1.18982
	0.929	3.704		0.712	1.372		0.455	1.735		4.07511	1.71822	2.41475				8.235	15.127		8.715	10.586		12.749	14.588		1.37584	0.974332	1.40828
	1.24	2.147		0.517	1.836		0.875	1.771		2.36211	2.29931	2.46486				13.005	13.552		9.918	11.688		9.217	12.815		1.23259	1.07576	1.23712
	1.221	2.429		0.862	0.538		0.839	1.5		2.67236	0.673763	2.08768				12.602	14.324		14.122	9.402		11.903	15.811		1.30281	0.865357	1.52634
	1.379	1.962		0.96	1.633		0.598	1.914		2.15857	2.04508	2.66388				13.902	11.186		12.186	14.821		9.833	10.5		1.0174	1.36412	1.01364
	1.303	2.913		0.994	0.704		0.859	1.804		3.20486	0.881653	2.51079				13.288	15.042		11.179	9.162		10.515	9.586		1.36811	0.843268	0.925401
	0.879	3.367			0.813			1.62		3.70434	1.01816	2.2547				12.396	15.414			10.382			10.931		1.40194	0.955556	1.05524
	1.218	5.541						1.863		6.09616		2.5929				14.139	12.888						11.146		1.1722		1.076
	0.885	4.061						1.481		4.46787		2.06124				8.454	13.049						9.325		1.18684		0.900205
	0.813	4.146								4.56139						9.839	13.049								1.18684
	0.981	2.083								2.2917						8.768	14.179								1.28962
	0.18	1.5								1.65029						7.311	12.255								1.11462
	0.647	2.597								2.8572						10.821	27.011								2.45672
		1.34								1.47426							16.62								1.51163
D
	GluA1 KO			GluA1/3 KO												GluA1 KO			GluA1/3 KO
mEPSC Frequency	ctrl	FSK		ctrl	FSK	fold freq change	GluA1 KO	GluA1/3 KO							mEPSC Amplitude	ctrl	FSK		ctrl	FSK	fold freq change	GluA1 KO	GluA1/3 KO
mean	0.338097	0.986809		0.0498286	0.0440238		2.91872	0.883503							mean	7.99285	8.52748		6.34946	5.9853		1.06689	0.942647
sd	0.159592	0.350519		0.0404595	0.0257926		1.03674	0.517626							sd	0.684223	0.842617		0.507826	0.633495		0.105421	0.0997714
n	11	10		11	8		10	8							n	11	10		11	8		10	8
SEM	0.0481189	0.110844		0.012199	0.00911906		0.327846	0.183008							SEM	0.206301	0.266459		0.153115	0.223974		0.0333372	0.0352745
F (equal var.)	0.389451			0.683086			0.0527872								F (equal var.)	0.594549			0.414375			0.940511
p (t-test)	5.23645e-06			0.960674			6.63628e-05								p (t-test)	0.150502			0.173721			0.0253593
log-transformed	-0.640753	0.0244245		-1.68696	-1.62711		0.495383	-0.324585							log-transformed	0.953053	0.921729		0.763612	0.727409		0.0190274	-0.0753279
	-0.766664	-0.137173		-1.09442	-1.22617		0.333786	0.0763513								0.865516	0.852422		0.773345	0.871149		-0.0502799	0.0684115
	-0.815689	-0.029384		-1.46064	-1.63036		0.441575	-0.327836								0.860577	0.924746		0.798069	0.734708		0.0220449	-0.0680295
	-0.571556	-0.00942097		-1.93667	-1.95425		0.461538	-0.651726								0.940631	0.911632		0.806829	0.750894		0.00893002	-0.0518431
	-0.52794			-1.09691												0.862875			0.827244
	-0.469822	-0.23202		-1.57096	-1.52433		0.238938	-0.221808								0.879125	0.97751		0.876965	0.768761		0.0748086	-0.0339756
	-0.269513	-0.107376		-1.94869	-1.36173		0.363583	-0.0592094								0.879772	0.89749		0.771661	0.803951		-0.0052114	0.0012136
	-0.594462	-0.199747		-1.32007			0.271212									0.874015	0.877391		0.793627			-0.0253108
	-0.430124			-1.30306												0.951247			0.803032
	-0.427662	0.0291885		-1.52852	-1.03402		0.500147	0.268503								0.900324	0.959566		0.762609	0.755036		0.0568648	-0.0477011
	-0.139264	0.095809		-0.808113	-1.16237		0.566768	0.140154								0.945399	0.980869		0.838471	0.78672		0.0781676	-0.0160171
		0.267925					0.738883										0.983344					0.0806429
raw data	0.22869	1.05785		0.020561	0.023599		3.12884	0.473603							raw data	8.97539	8.35082		5.80246	5.33838		1.04479	0.84076
	0.171134	0.729167		0.08046	0.059406		2.15668	1.19221								7.33696	7.11904		5.93396	7.43273		0.890677	1.17061
	0.152866	0.934579		0.034623	0.023423		2.76423	0.470071								7.25399	8.40904		6.28159	5.42885		1.05207	0.855009
	0.268191	0.978541		0.01157	0.011111		2.89426	0.222984								8.7223	8.1589		6.40957	5.635		1.02077	0.887477
	0.296524			0.08												7.29248			6.71806
	0.338983	0.586111		0.026856	0.0299		1.73356	0.600057								7.57051	9.49533		7.53294	5.87167		1.18798	0.92475
	0.537634	0.780952		0.011254	0.043478		2.30985	0.87255								7.58179	7.89751		5.911	6.36723		0.988072	1.0028
	0.254412	0.631325		0.047855			1.86729									7.48196	7.54034		6.21765			0.943385
	0.371429			0.049767												8.93815			6.35378
	0.373541	1.06952		0.029613	0.092466		3.16335	1.85568								7.94921	9.11101		5.78908	5.689		1.13989	0.895981
	0.725664	1.24683		0.155556	0.068807		3.6878	1.38087								8.81859	9.56906		6.894	6.11956		1.1972	0.963791
		1.85321					5.4813										9.62375					1.20405
E
	wild type			GluA3 KO			GluA3 KO + GFP-GluA3
single channel conductance	ctrl	FSK		ctrl	FSK		ctrl	FSK	fold cond change	wild type	GluA3 KO	GluA3 KO + GFP-GluA3
mean	16.5227	21.1877		15.8992	16.067		14.6555	18.7603		1.28234	1.01055	1.28009
sd	3.67798	3.52313		3.17275	3.04979		2.91987	4.13232		0.21323	0.19182	0.281964
n	13	10		8	8		8	11		10	8	11
SEM	1.02009	1.11411		1.12174	1.07826		1.03233	1.24594		0.0674291	0.0678188	0.0850153
	0.60154			0.717926			0.766716
	0.00867344			0.888635			0.0300162
log-transformed	1.24282	1.17668		1.1934	1.19017		1.06456	1.14203		-0.0414042	-0.0112061	-0.0239694
	1.28821	1.33576		1.1615	1.18908		1.26505	1.20024		0.117684	-0.012295	0.0342412
	1.07169	1.40087		1.15455	1.25744		1.08318	1.24239		0.182793	0.0560633	0.0763864
	1.07575	1.38194		1.02214	1.21439		1.30229	1.36417		0.163863	0.0130129	0.198174
	1.40449	1.37672		1.17105	1.15578		1.13086	1.34171		0.158637	-0.0455961	0.175711
	1.27084	1.39027		1.30411	1.12189		1.17532	1.4072		0.172185	-0.0794873	0.241204
	1.2663	1.34231		1.32564	1.35997		1.07465	1.22178		0.124234	0.158597	0.055779
	1.24903	1.3434		1.20809	1.10215		1.16723	1.14926		0.125323	-0.0992264	-0.016741
	1.2614	1.25289						1.29281		0.03481		0.126814
	1.18472	1.19342						1.3828		-0.0246561		0.216796
	1.09166							1.14602				-0.0199807
	1.13795
	1.15524
raw data	17.4913	15.0202		15.6098	15.4942		11.6026	13.8685		0.909067	0.974527	0.946304
	19.4181	21.6653		14.5044	15.4554		18.4098	15.8577		1.31125	0.972087	1.08203
	11.7949	25.1695		14.2741	18.09		12.1109	17.4738		1.52333	1.13779	1.1923
	11.9056	24.0959		10.5229	16.3828		20.0579	23.1299		1.45835	1.03042	1.57824
	25.3796	23.8077		14.8269	14.3146		13.5165	21.964		1.44091	0.900335	1.49869
	18.6568	24.5621		20.1424	13.24		14.9734	25.539		1.48657	0.832746	1.74262
	18.4627	21.9945		21.1661	22.9072		11.8755	16.664		1.33117	1.44078	1.13705
	17.7433	22.0497		16.147	12.6517		14.6972	14.1013		1.33451	0.795744	0.962186
	18.2559	17.9015						19.6252		1.08345		1.3391
	15.3011	15.6108						24.1433		0.944809		1.64739
	12.3499							13.9965				0.955035
	13.7387
	14.2969
F
	GluA1 KO			GluA1/3 KO
single channel conductance	ctrl	FSK		ctrl	FSK
mean	10.5854	13.3278		7.195	6.93605
sd	2.18084	1.60165		2.3255	1.60756
n	12	8		11	6
SEM	0.629555	0.566269		0.701166	0.656283
F (equal var.)	0.543007			0.576185
p (t-test)	0.0134943			0.936649
log-transformed	1.16615	1.08515		0.820188	0.670951
	1.00933	1.09688		0.78751	0.98822
	1.08761	1.17175		0.882826	0.742647
	1.13928	1.01228		0.622504	0.878223
	0.989574			0.624756
	1.04123	1.15273		0.88706	0.869337
	1.04275	1.10239		1.08297	0.826768
	1.0284	1.18587		0.731282
	0.937523			0.932991
	1.00569	1.16448		0.799306
	0.932991			1.01244
raw data	14.6605	12.1661		6.6098	4.6876
	10.2171	12.4991		6.1307	9.7324
	12.2351	14.8509		7.6353	5.529
	13.781	10.2869		4.1928	7.5548
	9.7628			4.2146
	10.9959	14.2146		7.7101	7.4018
	11.0344	12.6586		12.1051	6.7107
	10.6759	15.3416		5.3862
	8.6601			8.5702
	10.1318	14.6043		6.2995
	8.5702			10.2907
	6.2995
	10.2907
H
	GluA1 KO
Rectification Index	ctrl	FSK
mean	1.59646	1.45892
sd	0.405865	0.205238
n	6	6
SEM	0.165694	0.0837879
F (equal var.)	0.444512
p (t-test)	0.675666
log-transformed	0.116736
	0.277209	0.171185
	0.142118	0.0441178
	0.190496	0.215392
	0.0457207	0.144329
	0.367054	0.242738
raw data	1.30839	1.37837
	1.89325	1.48315
	1.38713	1.10692
	1.55059	1.64207
	1.11102	1.39421
	2.32838	1.74879

## Sheet: Figure 3 - supplement 1
Figure 3 - supplement 1 - source data
supplement 1
	wild type				wild type				wild type
IAMPA	ctrl	FSK		INMDA	ctrl	FSK		AMPA/NMDA Ratio	ctrl	FSK
mean	46.0689	45.2955		mean	35.5931	19.7712		mean	1.50696	3.48879
sd	17.2497	13.3212		sd	16.6919	10.8674		sd	0.739662	2.19753
n	9	13		n	9	13		n	9	13
SEM	5.74989	3.69464		SEM	5.56396	3.01406		SEM	0.246554	0.609486
F (equal var.)	0.280684			F (equal var.)	0.754964			F (equal var.)	0.130293
p (t-test)	0.8193			p (t-test)	0.0253705			p (t-test)	0.0143404
log-transformed	1.7846	1.47255		log-transformed	1.2482	1.46733		log-transformed	0.53642	0.0135113
	1.52746	1.50074			1.31237	1.35917			0.215082	0.428702
	1.3442	1.58229			1.08425	1.62567			0.259952	-0.0383227
	1.66838	1.72596			1.62823	1.55686			0.0516541	0.196867
	1.58846	1.58229			1.59882	1.42259			-0.00277093	0.153113
		1.72596				1.2305				0.396007
		1.65687				1.33371				0.323165
	1.74808	1.9051			1.69828	1.08607			0.0576281	0.81905
	1.92137	1.60427			1.82825	0.707749			0.078964	0.896526
	1.57213	1.62294			1.63771	1.07037			-0.0622715	0.552583
	1.55411	1.66308			1.43285	0.873443			0.125709	0.78963
		1.80983				1.18385				0.701991
		1.57873				0.988039				0.590686
raw data	60.898	29.686		raw data	17.7091	29.331		raw data	3.4389	1.0316
	33.687	31.677			20.5293	22.8652			1.6409	2.6835
	22.09	38.22			12.141	42.2351			1.8195	0.91554
	46.5995	53.2055			42.4842	36.0461			1.1263	1.5735
	38.767	37.328			39.7028	26.4599			0.99364	1.4227
		42.316				17.002				2.4889
		45.381				21.563				2.10458
	55.9855	80.372			49.9208	12.1918			1.1419	6.5925
	83.4385	40.204			67.3358	5.1021			1.1994	7.88
	37.336	41.97			43.4223	11.759			0.86642	3.5693
	35.8185	46.034			27.0926	7.4721			1.3357	6.1607
		64.5395				15.2703				5.0349
		37.908				9.72834				3.8966
	wild type				wild type				wild type
1/CV2 AMPA	ctrl	FSK		1/CV2 NMDA	ctrl	FSK		(1/CV2)AMPA/(1/CV2)NMDA	ctrl	FSK
mean	10.8967	3.97457		mean	6.77369	3.80824		mean	1.77026	1.78527
sd	7.79365	1.61362		sd	3.68466	1.39142		sd	0.81693	1.34973
n	9	13		n	9	13		n	9	13
SEM	2.59788	0.447537		SEM	1.22822	0.38591		SEM	0.27231	0.374347
F (equal var.)	0.503793			F (equal var.)	0.259871			F (equal var.)	0.528388
p (t-test)	0.00130105			p (t-test)	0.0406582			p (t-test)	0.710059
log-transformed	0.873827	0.624438		log-transformed	0.418058	0.613732		log-transformed	0.455769	0.00775887
	0.814699	0.507919			0.385667	0.633731			0.429032	0.572128
	0.573249	0.596235			0.773277	0.793872			-0.200027	-0.16278
	0.844575	0.55647			0.683422	0.743544			0.155437	-0.134897
	0.788264	0.536359			0.870613	0.690127			-0.0825045	-0.00135886
		0.633363			1.08605	0.347324			-0.108463	0.286038
	0.981981	0.812042			1.10533	0.685026			0.319266	0.127016
	1.45989	0.62836			0.964425	0.559003			0.371417	0.232488
	1.31539	0.0128178			0.554367	0.644072			0.359038	-0.278598
	0.907927	0.529383				0.22015				0.309233
		0.232756				0.534267				-0.290479
		0.673104				0.415137				0.437651
		0.868159				0.219056				0.719615
raw data	7.47872	4.21152		raw data	2.61853	4.10896		raw data	2.85607	1.01803
	6.52679	3.22047			2.43034	4.3026			2.68554	3.7336
	3.74325	3.94671			5.93303	6.22117			0.630918	0.687416
	6.99158	3.60139			4.82416	5.54044			1.43033	0.732998
	6.14135	3.43842			7.42358	4.89922			0.826981	0.996876
		4.29895			12.1913	2.22497			0.779	1.93214
	9.59359	6.48697			12.7447	4.84202			2.08577	1.33973
	28.8329	4.24972			9.2135	3.62245			2.35189	1.708
	20.6726	1.02995			3.58399	4.40628			2.2858	0.526504
	8.08959	3.38363				1.66016				2.03814
		1.70905				3.4219				0.512296
		4.7109				2.60098				2.73937
		7.38174				1.65598				5.24343

## Sheet: Figure 3 - supplement 2
Figure 3 - supplement 2 - source data
supplement 2
	wild type			GluA3 KO				wild type			GluA3 KO
mEPSC Frequency	IBMX	IBMX+cAMP		IBMX	IBMX+cAMP		mEPSC Amplitude	IBMX	IBMX+cAMP		IBMX	IBMX+cAMP
mean	1.41487	2.2062		1.61763	1.73438		mean	12.757	15.2952		10.2545	11.5467
sd	0.586155	0.73643		0.473931	0.748716		sd	2.28751	2.59464		1.04614	1.51268
n	11	10		8	8		n	11	10		8	8
SEM	0.176732	0.23288		0.16756	0.264711		SEM	0.68971	0.820497		0.369868	0.534815
F (equal var.)	0.398336			0.558027			F (equal var.)	0.653718			0.534915
p (t-test)	0.0171881			0.824666			p (t-test)	0.0365549			0.0766743
log-transformed	-0.104025			0.133858	0.156246		log-transformed	1.01009			0.968996	1.04712
	-0.0909791	0.129045		0.206286	0.251881			0.942058	1.08654		1.00788	1.04017
	0.172311	0.294687		0.148603	0.06032			1.13761	1.18201		1.01932	1.01427
	0.122871	0.385606		0.217484	0.209783			1.11644	1.13742		1.08647	1.03298
	0.171726	0.181558		0.373647	0.00432137			1.16161	1.16113		0.974281	1.08382
	0.115943	0.0934217		0.0629578	0.265761			1.18676	1.24127		0.966564	0.980503
				0.374565	0.554247						1.06543	1.10449
	0.442025	0.466571		0.0107239	0.161068			1.19002	1.29585		0.981093	1.16808
	-0.306977	0.288249						0.972851	1.0904
	0.276002	0.474944						1.1653	1.16782
	0.1811	0.320977						1.06491	1.13268
	0.229144	0.557146						1.1313	1.29072
raw data	0.787			1.361	1.433		raw data	10.235			9.311	11.146
	0.811	1.346		1.608	1.786			8.751	12.205		10.183	10.969
	1.487	1.971		1.408	1.149			13.728	15.206		10.455	10.334
	1.327	2.43		1.65	1.621			13.075	13.722		12.203	10.789
	1.485	1.519		2.364	1.01			14.508	14.492		9.425	12.129
	1.306	1.24		1.156	1.844			15.373	17.429		9.259	9.561
				2.369	3.583						11.626	12.72
	2.7671	2.928		1.025	1.449			15.489	19.763		9.574	14.726
	0.4932	1.942						9.394	12.314
	1.888	2.985						14.632	14.717
	1.5174	2.094						11.612	13.573
	1.6949	3.607						13.53	19.531

## Sheet: Figure 3 - supplement 3
Figure 3 - supplement 3 - source data
supplement 3
	GluA3 KO
rectification index	uninf	GFP-GluA3 inf
mean	2.60987	1.79409
sd	0.637053	0.393614
n	8	8
SEM	0.225232	0.139164
F (equal var.)	0.582071
p (t-test)	0.0115999
log-transformed
	0.177303	0.244754
	0.443807	0.12916
	0.443599	0.269373
	0.389902	0.143749
	0.328114	0.417344
	0.515122	0.250531
	0.357098	0.172036
	0.566593	0.325715
raw data
	1.50419	1.75693
	2.77848	1.34636
	2.77715	1.8594
	2.45415	1.39235
	2.1287	2.61423
	3.27433	1.78045
	2.27561	1.48606
	3.68632	2.11697

## Sheet: Figure 4
Figure 4 - source data
B
SEP-GluA1	ctrl							SEP-GluA1	FSK + IBMX							SEP-GluA1	no drugs		FSK+IBMX
Norm. F intensity	0 min	2 min	5 min	10 min	20 min	30 min		Norm. F intensity	0 min	2 min	5 min	10 min	20 min	30 min		Average F intensity	ctrl	Bleaching	ctrl	Bleaching
mean	1	0.3894	0.736875	0.81747	0.846372	1.038		mean	1	0.399852	0.682859	0.752037	0.701725	0.90352		mean	0.936582	0.942188	1.02337	0.802623
sd	0	0.0998463	0.202609	0.188648	0.19737	0.30708		sd	0	0.0948803	0.230293	0.116838	0.146602	0.216898		sd	0.20258	0.221763	0.195854	0.177631
n	8	8	8	8	8	8		n	6	6	6	6	6	6		n	6	8	6	6
SEM	0	0.035301	0.071633	0.0666971	0.0697807	0.108569		SEM	0	0.0387347	0.0940169	0.0476987	0.0598499	0.0885484		SEM	0.0827029	0.078405	0.0799571	0.0725174
F (equal var.)								F (equal var.)								F (equal var.)
p (t-test)								p (t-test)								p (t-test)
log-transformed	0	-0.343922	-0.271452	-0.215216	-0.236811	-0.104827		log-transformed	0	-0.656901	-0.522974	-0.153535	-0.260787	-0.1486		log-transformed	-0.00628565	-0.165824	0.058175	-0.201081
	0	-0.455101	-0.010564	-0.0329934	-0.0514868	0.185855			0	-0.34343	-0.172512	-0.0690026	-0.0483473	0.116331			0.109281	0.0831994	0.0136801	0.0417514
	0	-0.243748	-0.0732137	0.0189051	0.0550582	-0.0105448			0	-0.334453	-0.225983	-0.265022	-0.242167	-0.144094			-0.209371	0.0234944	-0.0315091	-0.190368
	0	-0.560311	-0.264848	-0.0964391	-0.0605691	-0.0877014			0	-0.474459	-0.149438	-0.140857	-0.100073	0.01232			-0.0428545	-0.0739232	-0.021006	-0.040251
	0	-0.456977	-0.310506	-0.20675	-0.201285	-0.00513362			0	-0.300967	-0.131184	-0.105287	-0.256877	-0.13826			0.00267568	-0.0922281	-0.140415	-0.193531
	0	-0.594869	-0.209724	-0.217156	-0.151442	-0.236228			0	-0.369717	0.0344536	-0.0428847	-0.0721776	-0.0315339			-0.0872249	-0.191769	0.133012	-0.0513802
	0	-0.418633	-0.0726132	-0.0937566	-0.0852465	0.0745374												0.00195297
	0	-0.317753	0.0183938	0.0510541	0.057528	0.156935												0.11007
raw data	1	0.452979	0.535239	0.609234	0.579681	0.785548		raw data	1	0.220343	0.299934	0.702206	0.548546	0.710232		raw data	0.985631	0.682615	1.14334	0.629389
	1	0.35067	0.975969	0.926844	0.888205	1.5341			1	0.453492	0.672184	0.853095	0.894649	1.30717			1.28612	1.21115	1.032	1.10091
	1	0.570495	0.844863	1.04449	1.13516	0.976012			1	0.462964	0.594315	0.543223	0.572576	0.717639			0.617488	1.05559	0.930017	0.645108
	1	0.275226	0.54344	0.800868	0.869823	0.817144			1	0.335383	0.708863	0.723008	0.794194	1.02877			0.906036	0.843484	0.952783	0.911484
	1	0.349159	0.489209	0.621227	0.629093	0.988249			1	0.500073	0.739292	0.784717	0.553507	0.727344			1.00618	0.808671	0.723744	0.640426
	1	0.254174	0.616987	0.606519	0.705599	0.58046			1	0.426858	1.08256	0.905973	0.846881	0.929964			0.818041	0.64303	1.35835	0.888423
	1	0.381388	0.846032	0.80583	0.821776	1.18724												1.00451
	1	0.481113	1.04326	1.12475	1.14164	1.43527												1.28846
C
SEP-GluA3	ctrl							SEP-GluA3	FSK + IBMX							SEP-GluA3	no drugs		FSK+IBMX
Norm. F intensity	0 min	2 min	5 min	10 min	20 min	30 min		Norm. F intensity	0 min	2 min	5 min	10 min	20 min	30 min		Average F intensity	ctrl	Bleaching	ctrl	Bleaching
mean	1	0.324236	0.59082	0.680426	0.678309	0.726813		mean	1	0.32178	0.661813	0.744144	0.839783	0.758289		mean	1.02704	0.702561	1.11308	0.799036
sd	0	0.05505	0.0884991	0.100219	0.157103	0.121301		sd	0	0.113277	0.163211	0.234372	0.267666	0.276355		sd	0.127431	0.136241	0.133695	0.263285
n	7	7	7	7	7	7		n	8	8	8	8	8	8		n	5	7	5	8
SEM	0	0.0208069	0.0334495	0.0378791	0.0593795	0.0458475		SEM	0	0.0400495	0.0577039	0.0828632	0.0946341	0.0977062		SEM	0.0569887	0.0514943	0.0597901	0.0930854
log-transformed	0	-0.570779	-0.343001	-0.193308	-0.321896	-0.270133		log-transformed	0	-0.506782	-0.22828	-0.0455539	-0.129561	-0.0701128		log-transformed	0.0191666		0.00901979	-0.0988202
	0	-0.608871	-0.287942	-0.138528	-0.128911	-0.132289			0	-0.301418	-0.0881082	0.0601915	0.0595028	0.0876572			-0.0238725	-0.295244	-0.0187642	0.0738081
	0	-0.488895	-0.155202	-0.161289	-0.0419955	-0.0327919			0	-0.307135	-0.125757	-0.173202	-0.112278	-0.114509			-0.0242567	-0.130596	0.0175354	-0.113392
	0	-0.468774	-0.219429	-0.0822903	-0.0534991	-0.0728946			0	-0.560997	-0.0769416	-0.0678785	0.0240577	-0.144159			0.103253	-0.0373693	0.098778	-0.0519564
	0	-0.472288	-0.254532	-0.209211	-0.242052	-0.205333			0	-0.512843	-0.0991077	-0.0706265	-0.0122073	-0.0856426			-0.0317455	-0.0630883	0.110621	-0.0473746
	0	-0.364537	-0.141474	-0.116777	-0.265511	-0.135036			0	-0.48829	-0.189676	-0.406695	-0.492502	-0.686679				-0.223304		-0.578827
	0	-0.492672	-0.232733	-0.304327	-0.206784	-0.164543			0	-0.734623	-0.480473	-0.363495	-0.224118	-0.261948				-0.195392		-0.242621
									0	-0.746107	-0.277493	-0.153229	0.0450611	-0.0305221				-0.18515		0.00891173
raw data	1	0.268671	0.453941	0.640755	0.476545	0.536867		raw data	1	0.311328	0.59118	0.900422	0.74206	0.850917		raw data	1.04512		1.02099	0.796489
	1	0.24611	0.515297	0.726896	0.743171	0.737414			1	0.499553	0.816379	1.14866	1.14684	1.22365			0.946515	0.506706	0.957714	1.18525
	1	0.324418	0.699517	0.68978	0.90783	0.927274			1	0.493021	0.748589	0.671116	0.772187	0.768229			0.945678	0.740293	1.0412	0.770208
	1	0.339802	0.603352	0.827389	0.884099	0.845484			1	0.274791	0.837642	0.855306	1.05696	0.717531			1.26839	0.917552	1.25539	0.887245
	1	0.337064	0.556503	0.617716	0.572728	0.623257			1	0.307013	0.795962	0.849911	0.972283	0.821027			0.929511	0.864792	1.29009	0.896655
	1	0.431979	0.721981	0.764228	0.542611	0.732763			1	0.32487	0.646136	0.392017	0.321735	0.205741				0.597993		0.263738
	1	0.321609	0.58515	0.496219	0.621178	0.684632			1	0.184237	0.330771	0.433017	0.596873	0.547082				0.637687		0.571978
									1	0.179429	0.527846	0.702702	1.10933	0.932133				0.652905		1.02073

## Sheet: Figure 4 - supplement 1
Figure 4 - supplement 1 - source data
supplement 1
A
tdTomato GluA1	ctrl							tdTomato GluA1	FSK + IBMX
Norm. F intensity	0 min	2 min	5 min	10 min	20 min	30 min		Norm. F intensity	0 min	2 min	5 min	10 min	20 min	30 min
mean	1	1.08901	0.977906	1.07212	1.03798	1.21941		mean	1	0.936044	0.967681	0.98906	0.913279	1.0923
sd	0	0.176891	0.111458	0.132613	0.212711	0.126178		sd	0	0.261884	0.191719	0.273509	0.189558	0.25292
n	8	8	8	8	8	8		n	6	6	6	6	6	6
SEM	0	0.0625406	0.0394065	0.0468857	0.0752045	0.0446106		SEM	0	0.106914	0.0782688	0.11166	0.0773868	0.103254
F (equal var.)								F (equal var.)
p (t-test)								p (t-test)
log-transformed	0	0.0693595	-0.0562864	-0.0755884	-0.147412	-0.0300741		log-transformed	0	-0.0340447	-0.0150899	-0.0521689	-0.0713773	-0.0127034
	0	-0.085431	-0.0491481	-0.0281251	-0.00796459	0.111435			0	-0.0055623	-0.0336344	-0.0274736	-0.0283647	0.0754553
	0	-0.105326	-0.0256868	0.00379948	-0.110954	0.0627959			0	-0.347086	-0.215	-0.331554	-0.227328	-0.199163
	0	0.0483618	-0.085264	0.0234064	0.0500041	0.132894			0	0.01898	0.0278562	0.0942398	-0.0236459	0.0502993
	0	0.0747561	-0.0232865	0.0914925	0.0636193	0.124694			0	0.124596	0.0973156	0.102879	0.093442	0.166636
	0	0.0530869	0.0548757	0.0437693	0.0149836	0.071215			0	-0.0566331	-0.00532702	0.0542874	-0.0386216	0.0682742
	0	0.12628	0.0452952	0.0586507	0.0344688	0.099547
	0	0.0643558	0.0394458	0.0969548	0.157698	0.0961213
raw data	1	1.17317	0.878443	0.840256	0.712177	0.933095		raw data	1	0.924603	0.965851	0.886811	0.848443	0.971173
	1	0.821427	0.893001	0.937292	0.981828	1.29251			1	0.987274	0.925477	0.938699	0.936775	1.18975
	1	0.784646	0.942569	1.00879	0.774543	1.15557			1	0.449691	0.609537	0.466064	0.592478	0.632174
	1	1.11779	0.821743	1.05537	1.12203	1.35798			1	1.04467	1.06624	1.24234	0.947009	1.12279
	1	1.18783	0.947793	1.2345	1.15776	1.33258			1	1.33228	1.25117	1.2673	1.24006	1.4677
	1	1.13002	1.13469	1.10604	1.0351	1.17819			1	0.877742	0.987809	1.13315	0.91491	1.17024
	1	1.33746	1.10993	1.14459	1.0826	1.25761
	1	1.15973	1.09508	1.25013	1.4378	1.24773
tdTomato GluA3	ctrl							tdTomato GluA3	FSK + IBMX
Norm. F intensity	0 min	2 min	5 min	10 min	20 min	30 min		Norm. F intensity	0 min	2 min	5 min	10 min	20 min	30 min
mean	1	0.87956	1.07183	1.03227	0.857628	1.07272		mean	1	1.08774	1.17624	1.15572	1.38215	1.23643
sd	0	0.243487	0.11849	0.226093	0.190171	0.185168		sd	0	0.150236	0.179203	0.17576	0.629037	0.190637
n	7	7	7	7	7	7		n	7	7	7	7	7	7
SEM	0	0.0920293	0.0447849	0.085455	0.071878	0.0699871		SEM	0	0.0567841	0.0677322	0.0664309	0.237753	0.0720539
F (equal var.)								F (equal var.)
p (t-test)								p (t-test)
log-transformed	0	-0.0615283	0.0427204	-0.0866933	0.0510726	0.047165		log-transformed	0	0.14935	0.0900258	0.0603034	0.0672472	0.0603465
	0	-0.11289	0.0561674	-0.0256767	-0.084338	-0.0278018			0	-0.0247038	0.0964066	0.0261208	-0.00494996	0.0527143
	0	-0.444203	0.0657201	0.0747506	-0.276413	0.017653			0	0.0309181	0.0353317	0.0600172	0.0223059	0.0984897
	0	0.0743812	0.0855945	0.176528	0.0438007	0.160445			0	-0.0110662	0.0492719	0.135926	0.228119	0.170261
	0	-0.00544047	-0.0254538	-0.0770468	-0.0698602	-0.0019234			0	0.00345924	-0.00950841	-0.0345217	-0.137012	0.00608935
	0	-0.0151398	0.0337988	0.0220616	-0.100686	0.0632279			0	0.0733935	0.00832205	-0.0017895	0.105627	0.0315131
	0	0.00784802	-0.0674679	-0.0528811	-0.110506	-0.0884983			0	0.00786935	0.190947	0.15955	0.442562	0.191157
raw data	1	0.867904	1.10337	0.819043	1.12479	1.11472		raw data	1	1.41043	1.23034	1.14896	1.16747	1.14907
	1	0.771098	1.13807	0.942591	0.823497	0.93799			1	0.944705	1.24855	1.06199	0.988667	1.12905
	1	0.359581	1.16338	1.18782	0.52916	1.04148			1	1.07379	1.08475	1.1482	1.0527	1.25456
	1	1.18681	1.21785	1.50151	1.10612	1.44692			1	0.974841	1.12014	1.3675	1.69091	1.48
	1	0.987551	0.943075	0.837439	0.851412	0.995581			1	1.008	0.978344	0.923588	0.729438	1.01412
	1	0.96574	1.08093	1.05211	0.793075	1.15672			1	1.18411	1.01935	0.995888	1.27534	1.07526
	1	1.01824	0.856115	0.885358	0.775343	0.815646			1	1.01829	1.5522	1.44394	2.77053	1.55295
B
SEP-GluA1	ctrl							SEP-GluA1	FSK + IBMX
Norm. F intensity	0 min	2 min	5 min	10 min	20 min	30 min		Norm. F intensity	0 min	2 min	5 min	10 min	20 min	30 min
mean	1	0.869322	0.901854	0.854037	0.913988	0.959177		mean	1	1.09226	1.0101	0.866895	0.957393	1.08935
sd	0	0.239089	0.231483	0.358336	0.194766	0.252691		sd	0	0.166686	0.261838	0.0818192	0.225267	0.234414
n	6	6	6	6	6	6		n	6	6	6	6	6	6
SEM	0	0.0976076	0.0945026	0.14629	0.0795127	0.103161		SEM	0	0.0680493	0.106895	0.0334026	0.0919648	0.0956992
F (equal var.)								F (equal var.)
p (t-test)								p (t-test)
log-transformed	0	-0.228859	0.0513131	-0.0783021	-0.102217	0.0722422		log-transformed	0	0.0522198	-0.0725532	-0.04322	0.0538813	0.0624267
	0	0.115488	0.103941	0.206415	0.0761312	0.140079			0	-0.124958	-0.113212	-0.0993838	-0.14723	0.130824
	0	-0.0511095	-0.209371	-0.27901	-0.209371	-0.209371			0	0.0475525	-0.0853956	-0.0934484	-0.0800954	0.012184
	0	-0.198936	-0.0428545	-0.0618812	-0.0428545	-0.0428545			0	0.0511853	0.0257796	-0.106703	-0.0194894	-0.0225279
	0	-0.00309186	-0.0961349	-0.15982	0.0504876	-0.0510587			0	0.115578	0.00589617	-0.0469728	-0.120813	-0.160944
	0	-0.0933849	-0.160929	-0.225188	-0.067911	-0.107438			0	0.0531353	0.189654	0.00629229	0.13192	0.134102
raw data	1	0.590393	1.12542	0.835022	0.790283	1.18098		raw data	1	1.12777	0.846149	0.905274	1.13209	1.15459
	1	1.30463	1.2704	1.60848	1.1916	1.38064			1	0.749967	0.770527	0.795456	0.712476	1.35153
	1	0.888977	0.617488	0.526005	0.617488	0.617488			1	1.11571	0.821494	0.806402	0.831581	1.02845
	1	0.632505	0.906036	0.867199	0.906036	0.906036			1	1.12508	1.06116	0.782162	0.956116	0.94945
	1	0.992906	0.801429	0.692118	1.12328	0.889081			1	1.3049	1.01367	0.897485	0.757158	0.690329
	1	0.80652	0.690353	0.595405	0.855242	0.78084			1	1.13015	1.54758	1.01459	1.35494	1.36176
SEP-GluA3	ctrl							SEP-GluA3	FSK + IBMX
Norm. F intensity	0 min	2 min	5 min	10 min	20 min	30 min		Norm. F intensity	0 min	2 min	5 min	10 min	20 min	30 min
mean	1	1.13099	1.05375	1.0114	1.07139	0.982692		mean	1	1.16532	1.11163	1.14855	1.07599	1.15017
sd	0	0.114018	0.149427	0.135797	0.140955	0.126279		sd	0	0.179488	0.139409	0.10842	0.0724814	0.198084
n	5	5	5	5	5	5		n	5	5	5	5	5	5
SEM	0	0.0509905	0.066826	0.0607301	0.0630371	0.0564736		SEM	0	0.0802693	0.0623456	0.048487	0.0324147	0.088586
F (equal var.)								F (equal var.)
p (t-test)								p (t-test)
log-transformed	0	0.0589519	0.0812162	-0.016238	0.0151178	0.0231779		log-transformed	0	0.0859071	0.0724062	0.108084	0.023131	-0.00556582
	0	0.0487105	-0.032511	0.0201337	-0.0176754	-0.0301598			0	0.0150998	-0.0208634	0.0136216	-0.0150575	-0.0225027
	0	-0.0239106	-0.00956391	-0.0497798	-0.00732014	-0.0418807			0	0.00197804	-0.00485158	0.0051303	0.0201947	0.0148594
	0	0.115841	0.100335	0.0998046	0.129533	0.0752797			0	0.0314048	0.0395755	0.0725274	0.0597701	0.134569
	0	0.0564196	-0.0471398	-0.0476018	0.0131036	-0.0817652			0	0.174045	0.126884	0.091546	0.0660119	0.151072
raw data	1	1.14539	1.20564	0.963301	1.03542	1.05482		raw data	1	1.21873	1.18142	1.28258	1.05471	0.987266
	1	1.11869	0.927874	1.04745	0.960118	0.932911			1	1.03538	0.953096	1.03186	0.965923	0.949505
	1	0.946432	0.978219	0.891703	0.983286	0.90807			1	1.00456	0.988891	1.01188	1.0476	1.03481
	1	1.30569	1.2599	1.25836	1.34751	1.18927			1	1.07499	1.09541	1.18176	1.14755	1.36323
	1	1.13873	0.89714	0.896186	1.03063	0.82839			1	1.49295	1.33932	1.23466	1.16416	1.41603

[truncated: 7 more sheets: Figure 5, Figure 5 - supplement 1, Figure 5 - supplement 2, Figure 5 - supplement 3, Figure 6, Figure 6 - supplement 1, Figure 7]
