# Supplementary figures and images for: Synaptic plasticity through activation of GluA3-containing AMPA-receptors
Source: eLife journal article supplement (doi:10.7554/elife.25462), 2017-08-01

Figure 1 - figure supplement 1

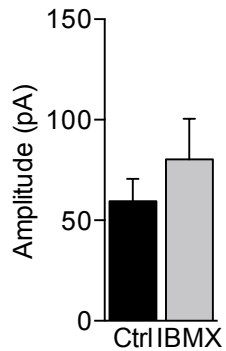

Supplement: supp [file elife_poa_e25462_Figure_1_figure_supplement_1.pdf › elife_poa_e25462_Figure_1_figure_supplement_1.pdf]

Figure 1 - figure supplement 2

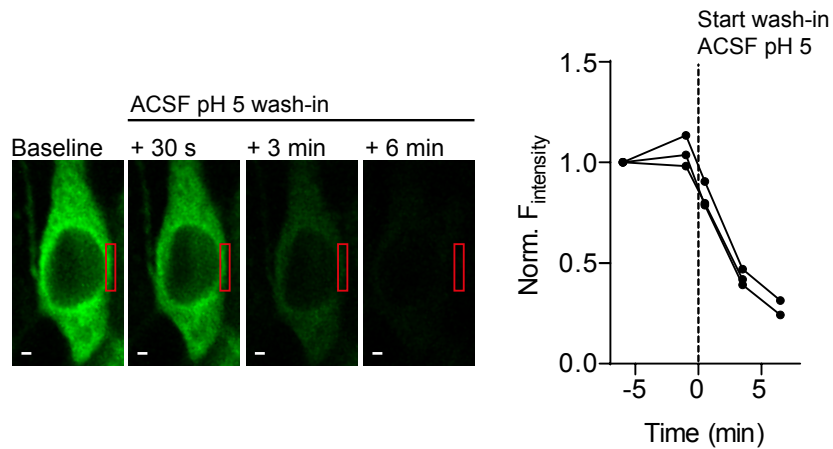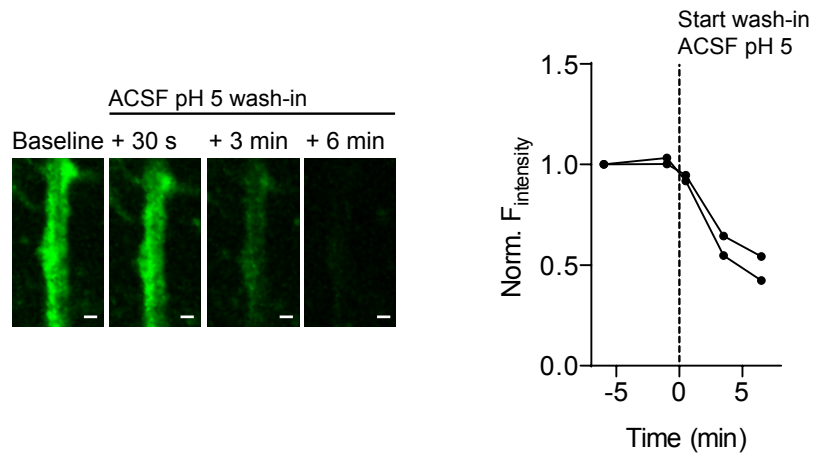

Supplement: supp [file elife_poa_e25462_Figure_1_figure_supplement_2.pdf › elife_poa_e25462_Figure_1_figure_supplement_2.pdf]

Figure 3 - figure supplement 1

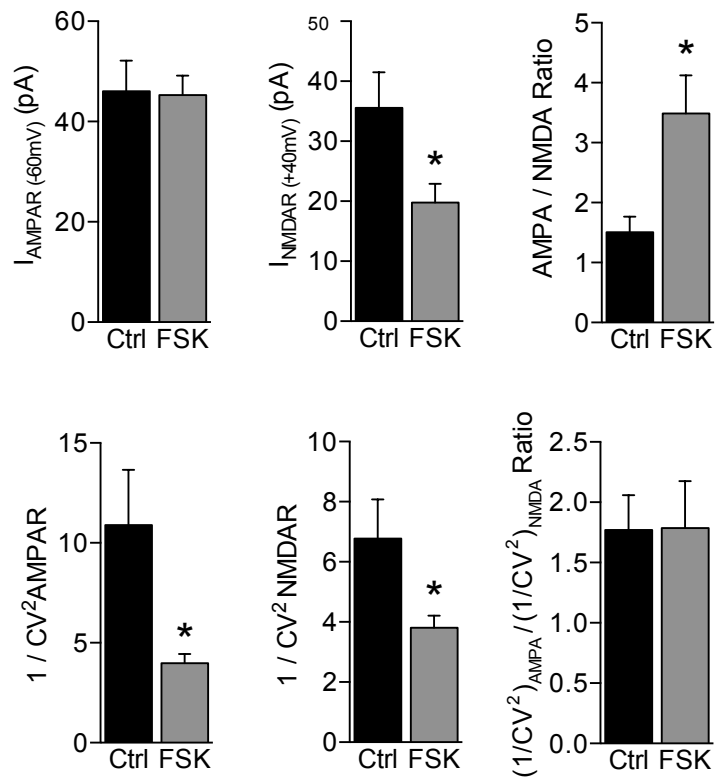

Supplement: supp [file elife_poa_e25462_Figure_3_figure_supplement_1.pdf › elife_poa_e25462_Figure_3_figure_supplement_1.pdf]

Figure 3 - figure supplement 2

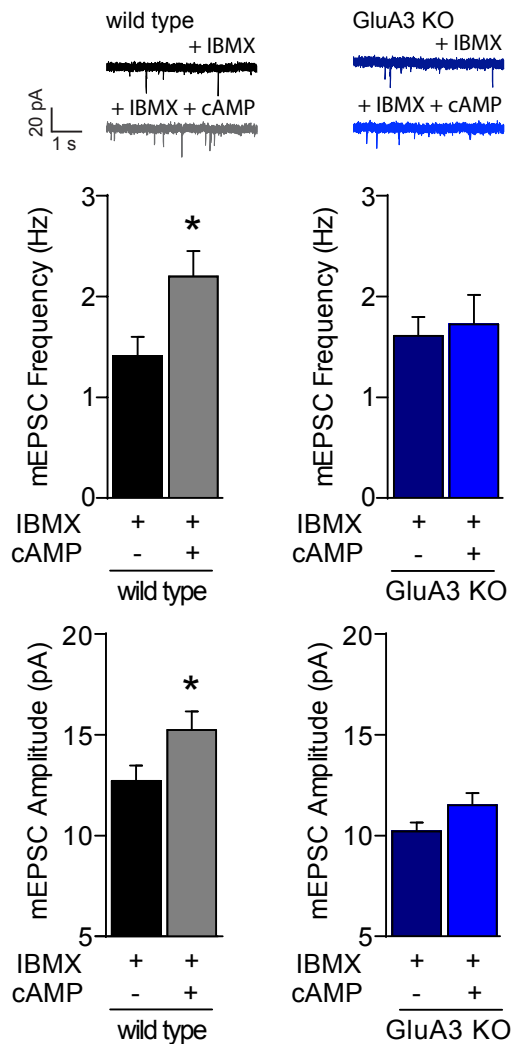

Supplement: supp [file elife_poa_e25462_Figure_3_figure_supplement_2.pdf › elife_poa_e25462_Figure_3_figure_supplement_2.pdf]

Figure 3 - figure supplement 3

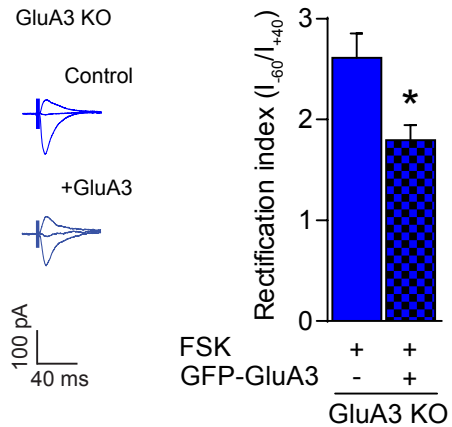

Supplement: supp [file elife_poa_e25462_Figure_3_figure_supplement_3.pdf › elife_poa_e25462_Figure_3_figure_supplement_3.pdf]

A

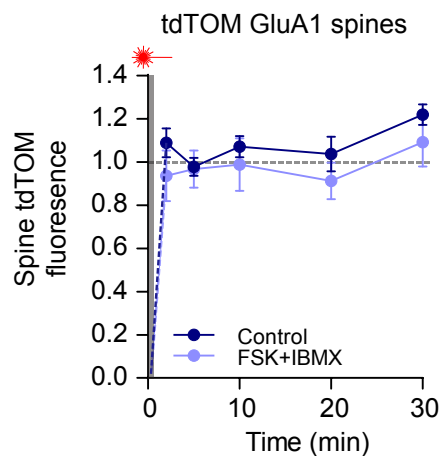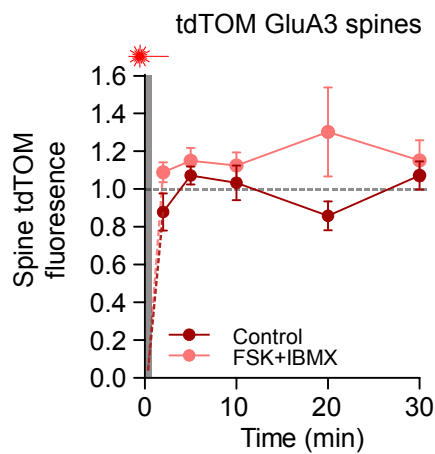

B

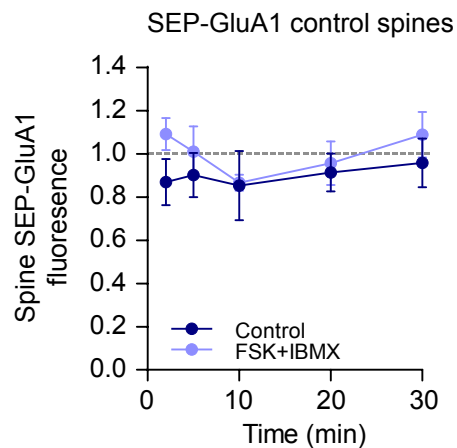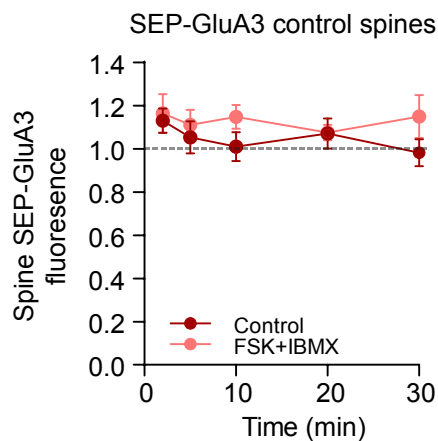

Supplement: supp [file elife_poa_e25462_Figure_4_figure_aupplement_1.pdf › elife_poa_e25462_Figure_4_figure_aupplement_1.pdf]

Figure 5 - figure supplement 1

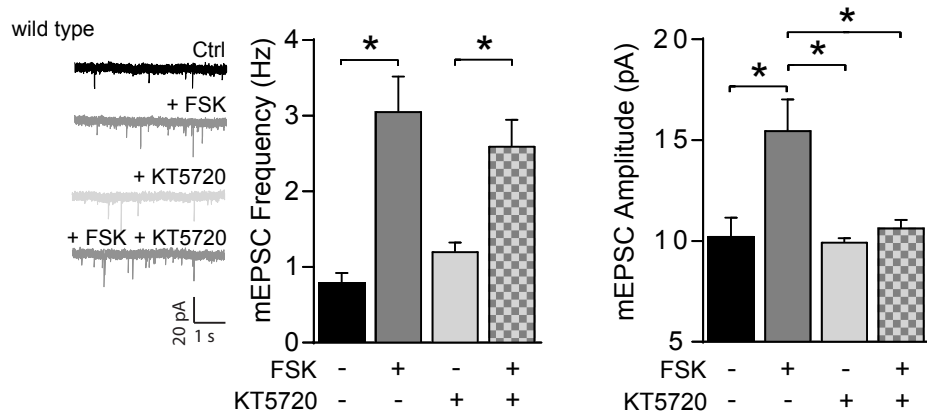

Supplement: supp [file elife_poa_e25462_Figure_5_figure_supplement_1.pdf › elife_poa_e25462_Figure_5_figure_supplement_1.pdf]

Figure 5 - figure supplement 2

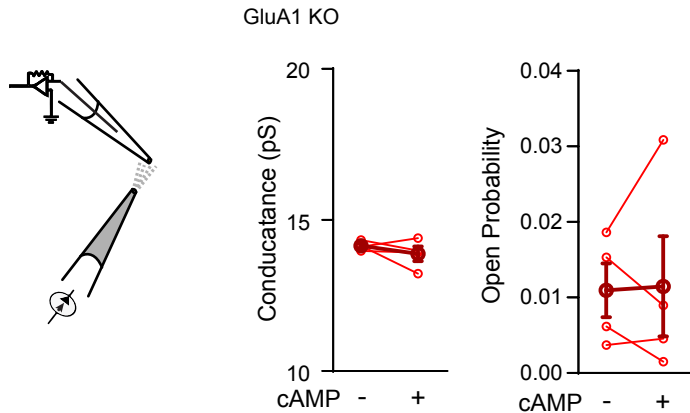

Supplement: supp [file elife_poa_e25462_Figure_5_figure_supplement_2.pdf › elife_poa_e25462_Figure_5_figure_supplement_2.pdf]

Figure 5 - figure supplement 3

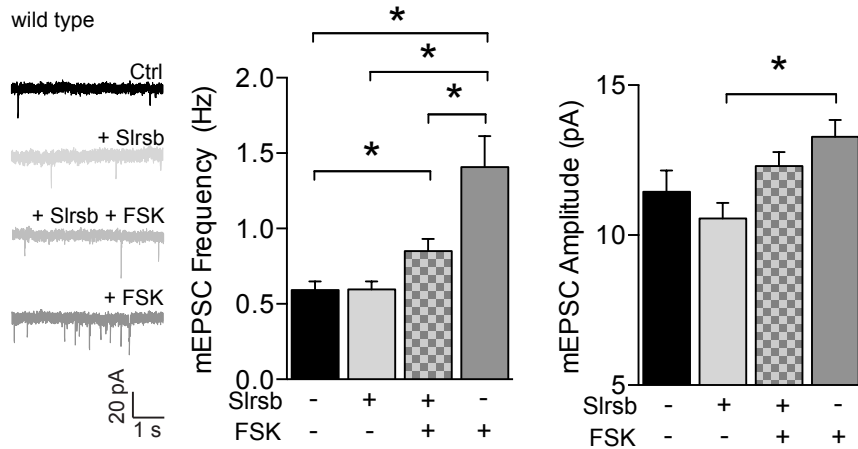

Supplement: supp [file elife_poa_e25462_Figure_5_figure_supplement_3.pdf › elife_poa_e25462_Figure_5_figure_supplement_3.pdf]

Figure 6 - figure supplement 1

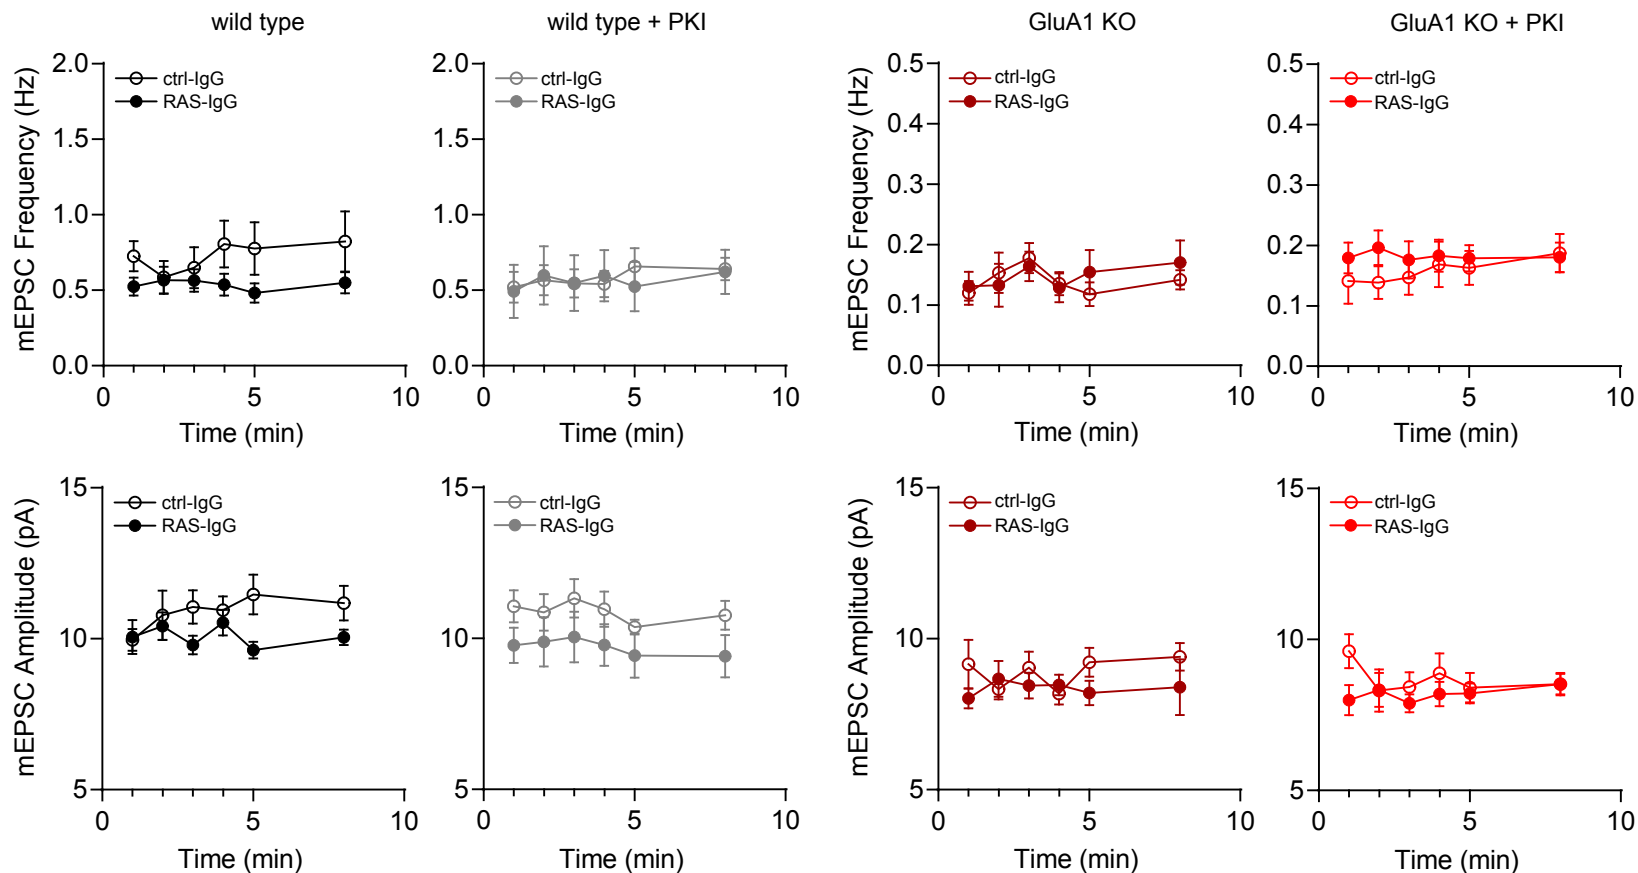

Supplement: supp [file elife_poa_e25462_Figure_6_figure_supplement_1.pdf › elife_poa_e25462_Figure_6_figure_supplement_1.pdf]

A

Wild type + PKI

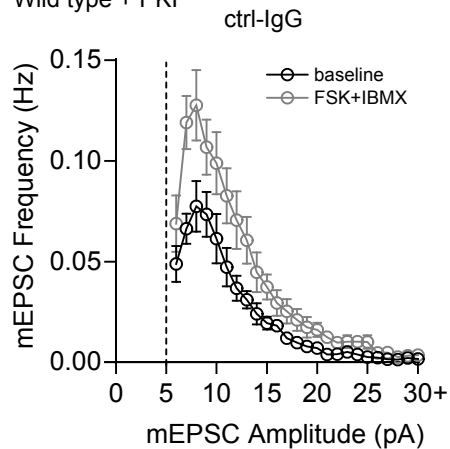

RAS-IgG

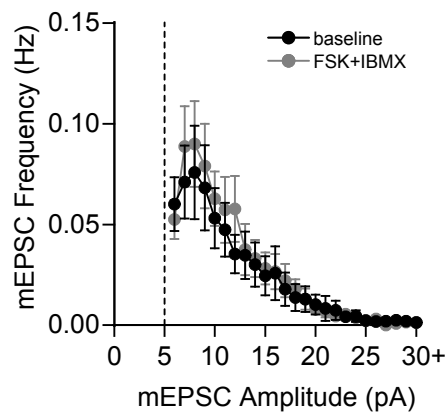

B

GluA1 KO + PKI

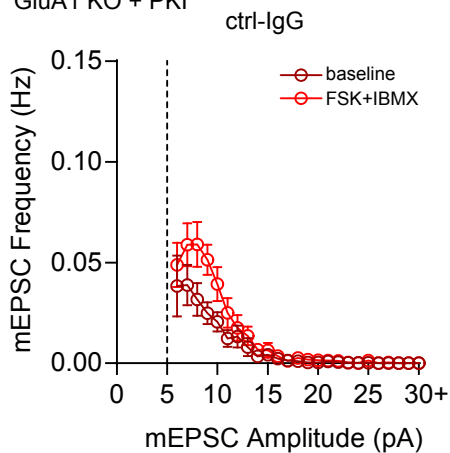

RAS-IgG

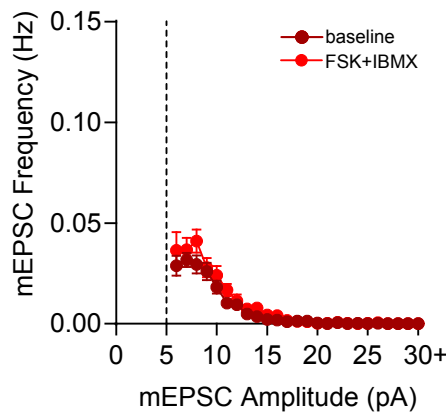

Supplement: supp [file elife_poa_e25462_Figure_6_figure_supplement_2.pdf › elife_poa_e25462_Figure_6_figure_supplement_2.pdf]
